# Supplementary material
Source: MDPI journal article supplement (https://www.mdpi.com/2075-163X/11/12/1315)

Figure S1. HPLC calibration curve

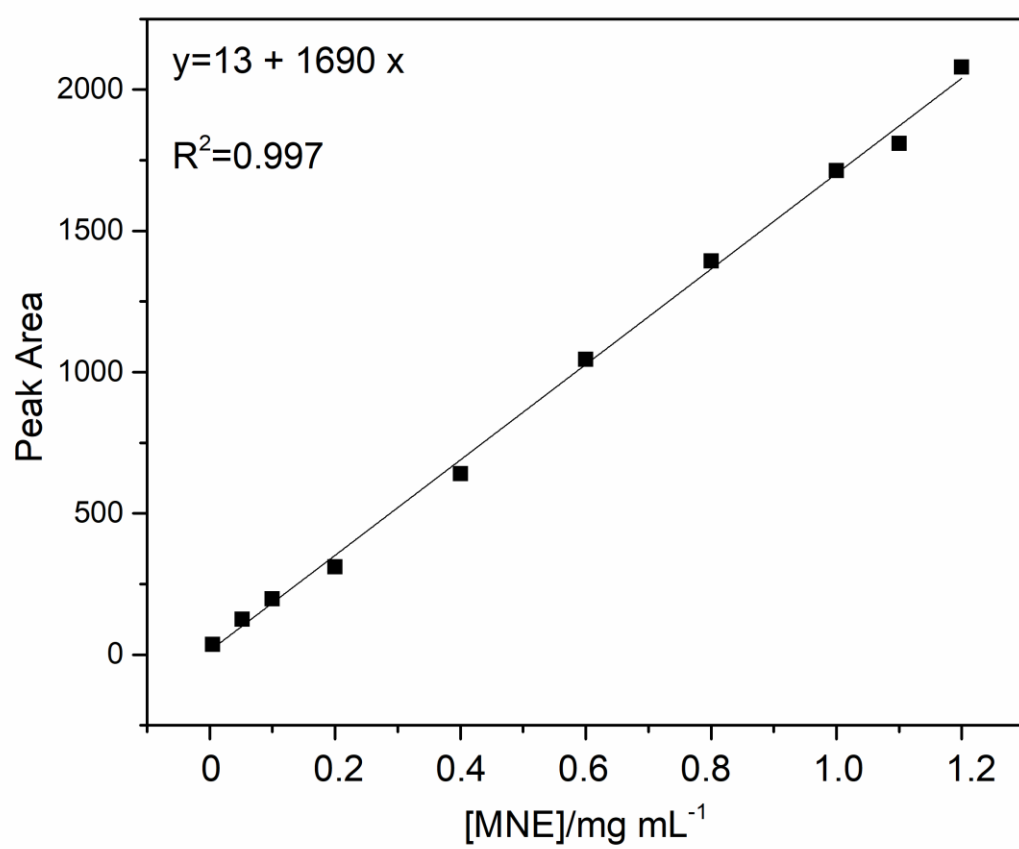

Supplement: s1 [file s1]
